# Supplementary material for: Synthesis and characterization of a dual-stimuli-responsive cobalt(iii) complex: comparison of photo-/thermo-mechanical behaviour in crystal and polymer composites
Source: Royal Society of Chemistry journal article supplement (doi:10.1039/d4ce00638k), 2024-01-01
Supplement: d4ce00638k1.pdf [file d4ce00638k1.pdf]

## SUPPORTING INFORMATION

Synthesis, characterization of a dual-stimuli-responsive cobalt(III) complex: comparison of photo/thermo mechanical behaviour in crystal and polymer composite

Manjeet Singh,<sup>a</sup> Karan Kumar Narang,<sup>a</sup> Yashpreet Kaur,<sup>a</sup> Ranjan Patra,<sup>b</sup> Prasant K. Nanda<sup>\*c</sup> and Subash C. Sahoo<sup>\*a</sup>

<sup>a</sup>*Department of Chemistry and Centre for Advanced Studies in Chemistry, Panjab University, Sector-14, Chandigarh, 160014, India*

<sup>b</sup>*Amity Institute of Click Chemistry Research and Studies (AICCRS), Amity University, Sector-125, Noida, Uttar Pradesh, 201303, India*

<sup>c</sup>*Department of Applied Science, University Institute of Engineering and Technology, Panjab University, Sector-25, Chandigarh, 160014, India*

\*Corresponding author. *Email address:* [scsahoo@pu.ac.in](mailto:scsahoo@pu.ac.in), [pknanda@pu.ac.in](mailto:pknanda@pu.ac.in)

## Table of Content

| Number           | Content                                                                                                                                                                                                                             | Page No   |
|------------------|-------------------------------------------------------------------------------------------------------------------------------------------------------------------------------------------------------------------------------------|-----------|
| <b>Table S1</b>  | Crystallographic data of complex <b>C-1</b> .                                                                                                                                                                                       | <b>3</b>  |
| <b>Fig. S1</b>   | FTIR spectrum of <b>C-1</b> .                                                                                                                                                                                                       | <b>4</b>  |
| <b>Fig. S2</b>   | ORTEP diagram of <b>C-1</b> with atoms numbering scheme. Thermal ellipsoid set at 40 % probability.                                                                                                                                 | <b>4</b>  |
| <b>Table S2</b>  | Selected bond lengths ( $\text{\AA}$ ) and bond angles ( $^\circ$ ) observed for complex <b>C-1</b> .                                                                                                                               | <b>5</b>  |
| <b>Fig. S3</b>   | Hydrogen bonding network of complex <b>C-1</b> .                                                                                                                                                                                    | <b>6</b>  |
| <b>Table S3</b>  | Hydrogen bonding distance ( $\text{\AA}$ ) and angles ( $^\circ$ ) of complex <b>C-1</b> .                                                                                                                                          | <b>6</b>  |
| <b>Fig. S4</b>   | Solid-state UV spectra of <b>C-1</b> (before and after UV irradiation).                                                                                                                                                             | <b>7</b>  |
| <b>Fig. S5</b>   | Optical Microscope image of <b>C-1</b> crystals before (a) and after (b) UV irradiation.                                                                                                                                            | <b>8</b>  |
| <b>Fig. S6</b>   | The VDP diagram of the ground state (GS) $\text{NO}_2$ using TOPOS software of complex <b>C-1</b> .                                                                                                                                 | <b>9</b>  |
| <b>Fig. S7</b>   | Single crystals of <b>C-1</b> showing photomechanical motion under UV light. The initial and final positions are marked as blue and red circles respectively. The images were extracted from Video S2.                              | <b>9</b>  |
| <b>Fig. S8</b>   | Single crystals of <b>C-1</b> showing photomechanical motion under UV light. The initial and final positions are marked as blue and red circles respectively. The images were extracted from video S3.                              | <b>10</b> |
| <b>Fig. S9</b>   | Single crystals of <b>C-1</b> showing the thermomechanical motion at temperature 60-65 $^\circ\text{C}$ . The initial and final positions are marked as blue and red circles respectively. The images were extracted from Video S6. | <b>10</b> |
| <b>Table S4</b>  | Distance transverse by the crystal of different sizes.                                                                                                                                                                              | <b>11</b> |
| <b>Table S5</b>  | Lattice parameters of <b>C-1</b> extracted from the VT-PXRD data (30 and 60 $^\circ\text{C}$ ).                                                                                                                                     | <b>11</b> |
| <b>Fig. S10.</b> | PXRD pattern of <b>C-1</b> (30 and 60 $^\circ\text{C}$ ).                                                                                                                                                                           | <b>12</b> |
| <b>Fig. S11</b>  | FTIR Spectrum of <b>CPC-1</b> .                                                                                                                                                                                                     | <b>12</b> |
| <b>Fig. S12</b>  | TGA curves of (a) agarose film (b) <b>C-1</b> crystals (c) <b>CPC-1</b> .                                                                                                                                                           | <b>13</b> |
| <b>Fig. S13</b>  | (a) Pure Agarose Film (b) <b>CPC-1</b> under UV light (c) <b>CPC-1</b> film under heating (d) Flexibility test of <b>CPC-1</b> film.                                                                                                | <b>13</b> |
|                  | Descriptions of videos                                                                                                                                                                                                              | <b>14</b> |

**Table S1.** Crystallographic data of complex **C-1**.

| Identification code                         | C-1                                                              |
|---------------------------------------------|------------------------------------------------------------------|
| CCDC                                        | 2320472                                                          |
| Empirical formula                           | C <sub>18</sub> H <sub>31</sub> CoN <sub>8</sub> O <sub>12</sub> |
| M <sub>r</sub> [g mol <sup>-1</sup> ]       | 610.44                                                           |
| T [K]                                       | 293(2)                                                           |
| Crystal system                              | Monoclinic                                                       |
| Space group                                 | P21/n                                                            |
| a [Å]                                       | 14.2165(3)                                                       |
| b [Å]                                       | 6.20030(11)                                                      |
| c [Å]                                       | 28.4449(5)                                                       |
| α [deg]                                     | 90                                                               |
| β [deg]                                     | 92.0239(18)                                                      |
| γ [deg]                                     | 90                                                               |
| V [Å <sup>3</sup> ]                         | 2505.75(8)                                                       |
| Z                                           | 4                                                                |
| ρ <sub>calc</sub> [g cm <sup>-3</sup> ]     | 1.618                                                            |
| μ [mm <sup>-1</sup> ]                       | 0.764                                                            |
| F(000)                                      | 1272.0                                                           |
| Crystal size[mm <sup>3</sup> ]              | 0.020 × 0.015 × 0.008                                            |
| Radiation                                   | MoKα<br>(λ = 0.71073)                                            |
| θ <sub>min</sub> /θ <sub>max</sub> [deg]    | 6.502 to 54.696                                                  |
| Index ranges                                | -18 ≤ h ≤ 17, -7 ≤ k ≤ 8, -36 ≤ l ≤ 36                           |
| Reflections collected                       | 33972                                                            |
| Independent reflections                     | 5424<br>[R <sub>int</sub> = 0.0409, R <sub>sigma</sub> = 0.0311] |
| Data/restraints/<br>parameters              | 5424/6/381                                                       |
| GOF on F <sup>2</sup>                       | 1.163                                                            |
| final R indices [I > 2σ(I)]                 | R <sub>I</sub> = 0.0548, wR <sub>2</sub> = 0.1295                |
| R indices (all data)                        | R <sub>I</sub> = 0.0587, wR <sub>2</sub> = 0.1309                |
| largest diff peak/hole [e Å <sup>-3</sup> ] | 1.06/-0.56                                                       |

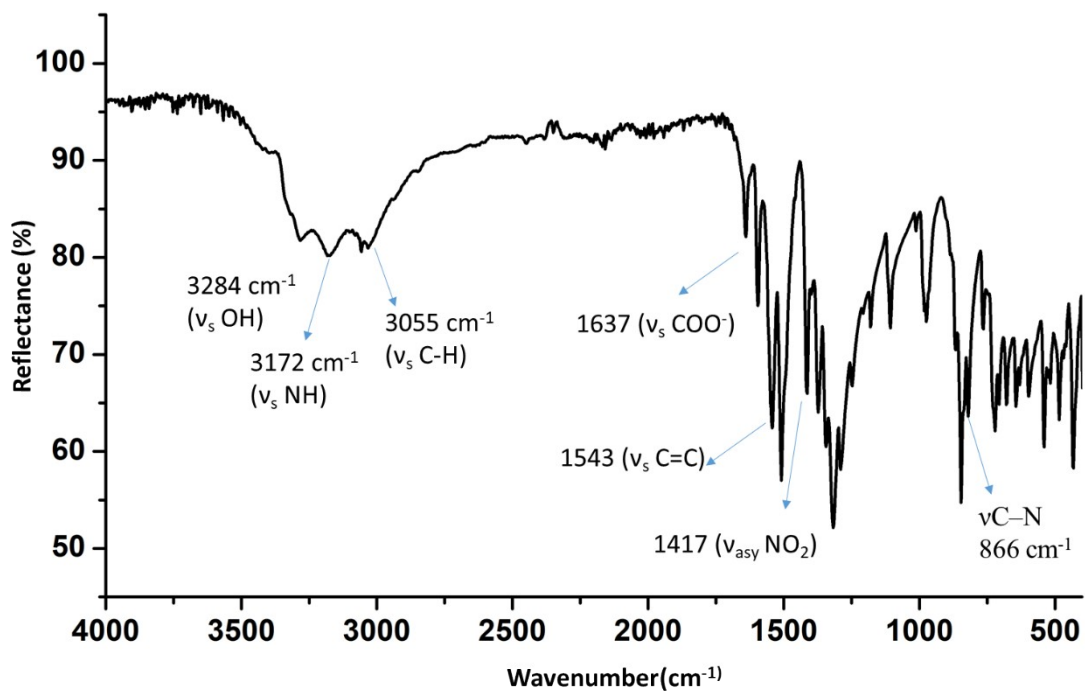

Fig. S1 FTIR spectrum of C-1.

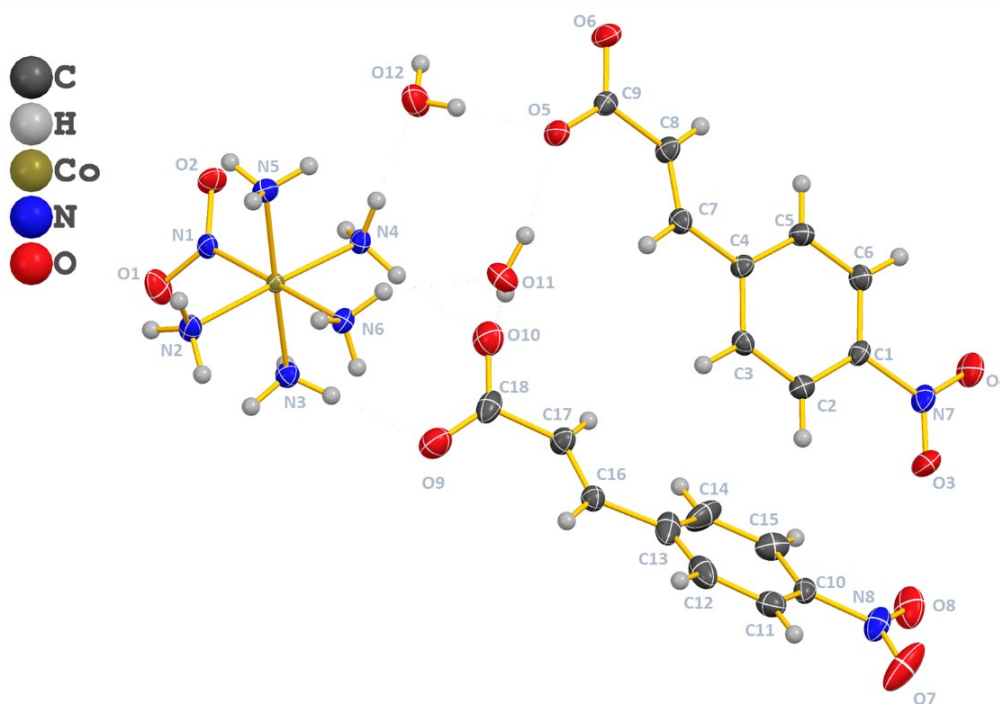

Fig. S2 ORTEP diagram of C-1 with atoms numbering scheme. Thermal ellipsoid set at 40 % probability.

**Table S2** Selected bond lengths (Å) and bond angles (°) observed for complex **C-1**.

| <b>C-1</b>   |                        |
|--------------|------------------------|
| <b>Atoms</b> | <b>Bond Length (Å)</b> |
| Co1N4        | 1.957(3)               |
| Co1N6        | 1.977(3)               |
| Co1N1        | 1.917(3)               |
| Co1N5        | 1.953(3)               |
| Co1N2        | 1.962(3)               |
| Co1N3        | 1.960(3)               |
| <b>C-1</b>   |                        |
| <b>Atoms</b> | <b>Bond Angle (°)</b>  |
| N4 Co1 N6    | 90.55(13)              |
| N4 Co1 N2    | 177.83(14)             |
| N4 Co1 N3    | 88.32(13)              |
| N1 Co1 N4    | 91.15(13)              |
| N1 Co1 N6    | 177.98(13)             |
| N1 Co1 N5    | 90.58(14)              |
| N1 Co1 N2    | 88.77(13)              |
| N1 Co1 N3    | 89.80(14)              |
| N5 Co1 N4    | 90.56(13)              |
| N5 Co1 N6    | 88.32(13)              |
| N5 Co1 N2    | 91.61(13)              |
| N5 Co1 N3    | 178.82(13)             |
| N2 Co1 N6    | 89.56(13)              |
| N3 Co1 N6    | 91.33(13)              |
| N3 Co1 N2    | 89.51(14)              |

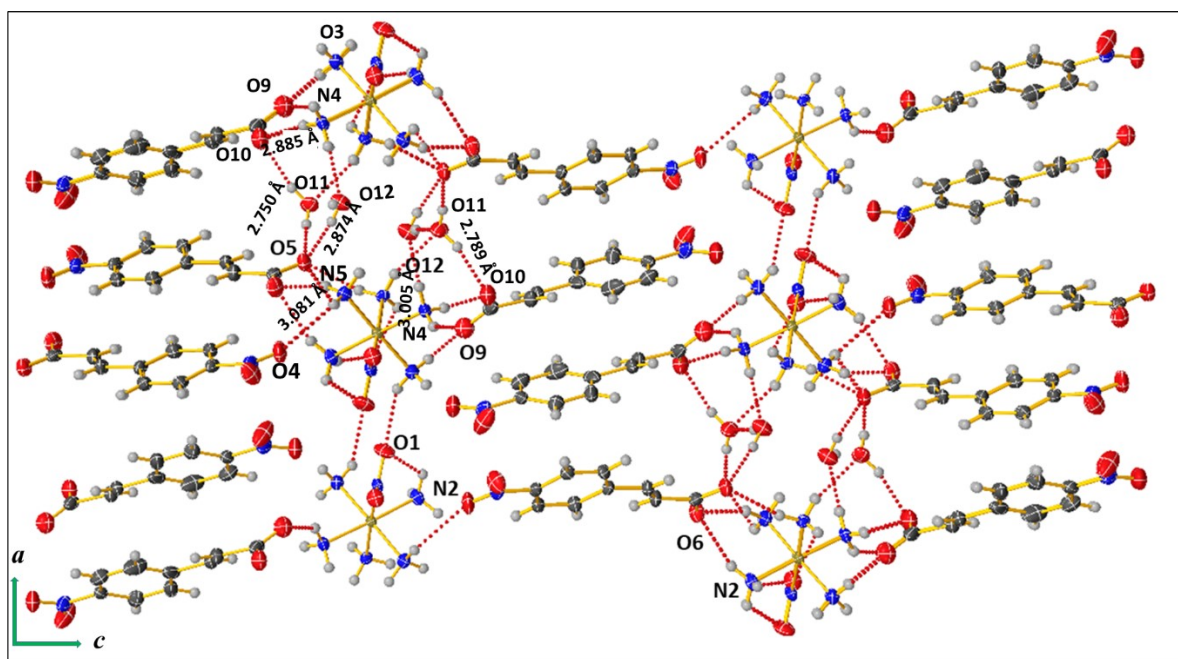

Fig. S3 Hydrogen bonding network of complex C-1.

Table S3 Hydrogen bonding distance (Å) and angles (°) of complex C-1.

| D   | H    | A                | d(D-H)/Å | d(H...A)/Å | d(D...A)/Å | D-H...A/° |
|-----|------|------------------|----------|------------|------------|-----------|
| O11 | H11A | O10              | 0.85     | 1.96       | 2.789(4)   | 166.4     |
| O11 | H11B | O5               | 0.85     | 1.91       | 2.750(4)   | 168.1     |
| O12 | H12A | O5               | 0.85     | 2.03       | 2.874(4)   | 173.2     |
| O12 | H12B | O11 <sup>1</sup> | 0.85     | 2.02       | 2.861(4)   | 171.7     |
| N4  | H4A  | O10              | 0.89     | 2.00       | 2.885(4)   | 172.2     |
| N4  | H4B  | O12              | 0.89     | 2.12       | 3.005(4)   | 176.8     |
| N4  | H4C  | O9 <sup>1</sup>  | 0.89     | 2.20       | 2.963(4)   | 143.5     |
| N6  | H6A  | O2 <sup>2</sup>  | 0.89     | 2.33       | 2.915(4)   | 123.6     |
| N6  | H6B  | O5 <sup>3</sup>  | 0.89     | 2.20       | 3.076(4)   | 167.3     |
| N6  | H6C  | O11              | 0.89     | 2.14       | 2.952(4)   | 150.9     |
| N5  | H5B  | O6 <sup>3</sup>  | 0.89     | 2.02       | 2.882(4)   | 161.4     |
| N5  | H5C  | O5 <sup>4</sup>  | 0.89     | 2.59       | 3.168(4)   | 123.0     |
| N5  | H5C  | O4 <sup>5</sup>  | 0.89     | 2.44       | 3.081(4)   | 128.9     |
| N2  | H2A  | O2 <sup>2</sup>  | 0.89     | 2.22       | 3.043(4)   | 154.5     |
| N2  | H2C  | O6 <sup>3</sup>  | 0.89     | 2.16       | 3.008(4)   | 159.3     |
| N3  | H3A  | O9               | 0.89     | 2.12       | 3.008(4)   | 177.8     |
| N3  | H3C  | O1 <sup>6</sup>  | 0.89     | 2.19       | 2.983(4)   | 147.5     |

<sup>1</sup>+X,-1+Y,+Z; <sup>2</sup>+X,1+Y,+Z; <sup>3</sup>1/2-X,1/2+Y,3/2-Z; <sup>4</sup>1/2-X,-1/2+Y,3/2-Z; <sup>5</sup>1/2+X,1/2-Y,1/2+Z; <sup>6</sup>3/2-X,1/2+Y,3/2-Z

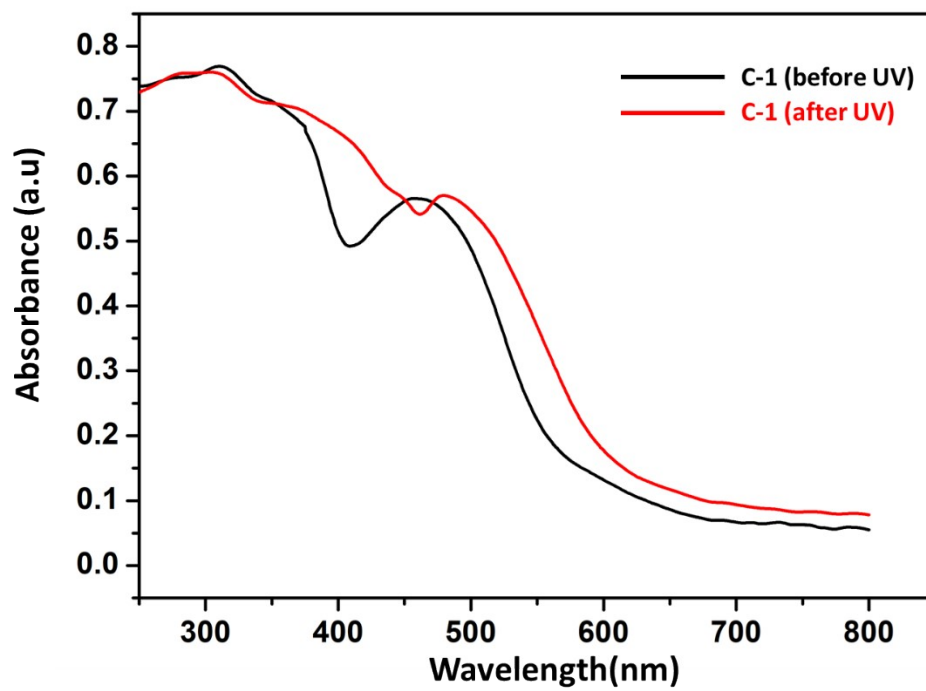

Fig. S4 Solid-state UV spectra of C-1 (before and after UV irradiation).

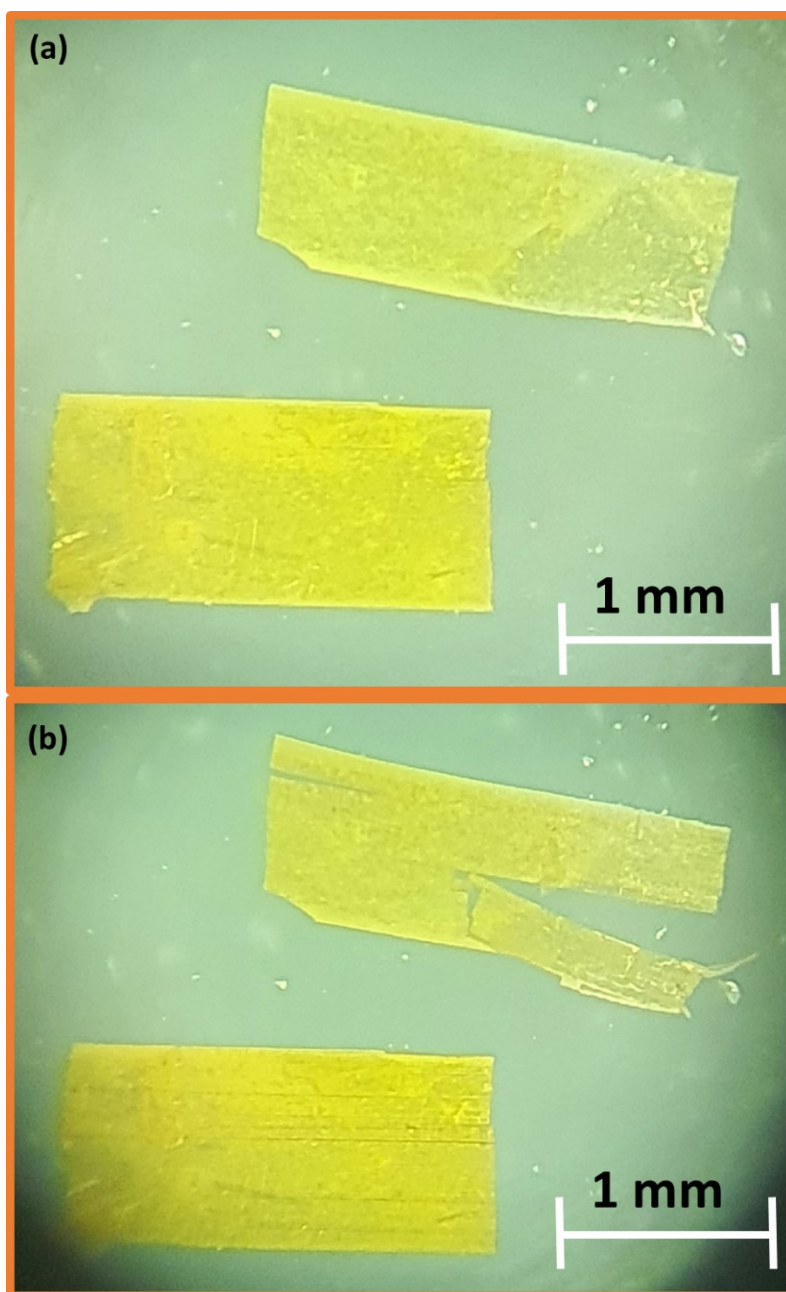

**Fig. S5** Optical Microscope image of **C-1** crystals before (a) and after (b) UV irradiation.



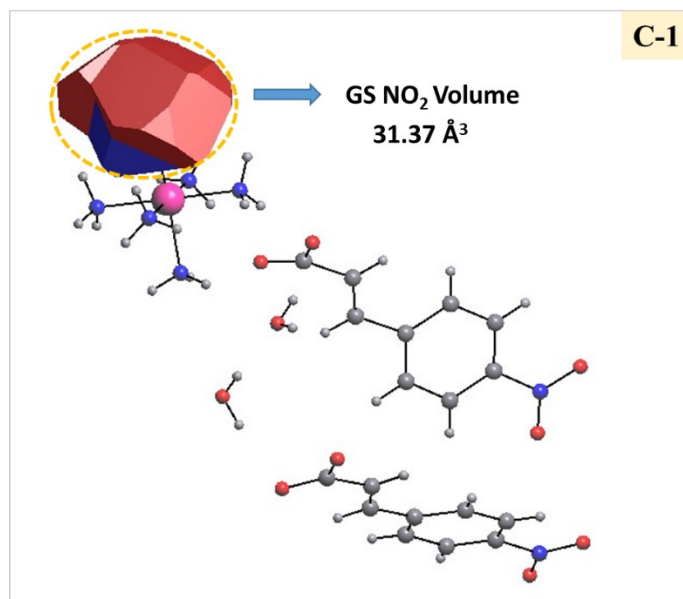

**Fig. S6** VDP diagram of the ground state (GS) NO<sub>2</sub> using TOPOS software of complex **C-1**.

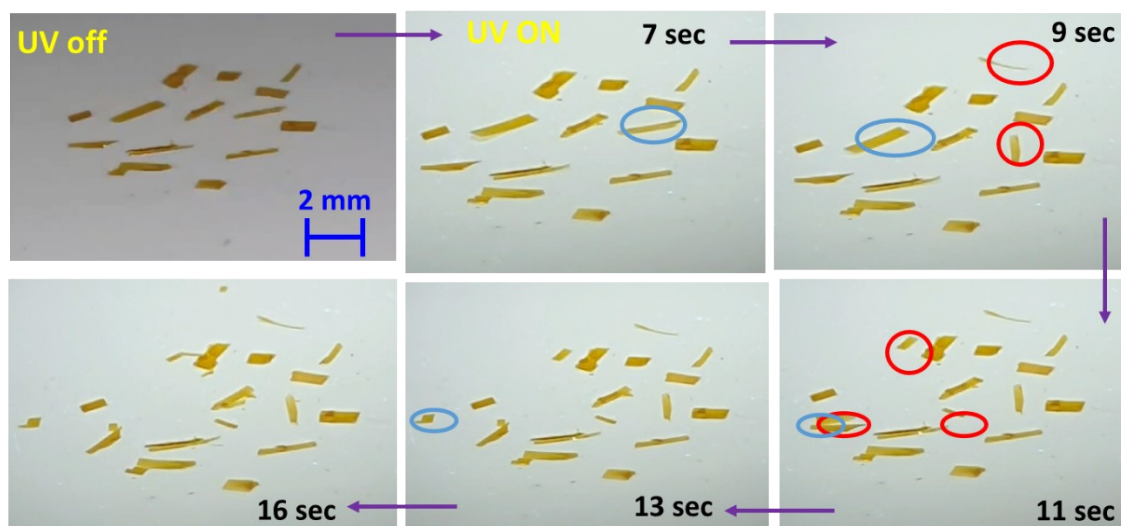

**Fig. S7** Single crystals of **C-1** showing photomechanical motion under UV light. The initial and final positions are marked as blue and red circles respectively. The images were extracted from Video S2.

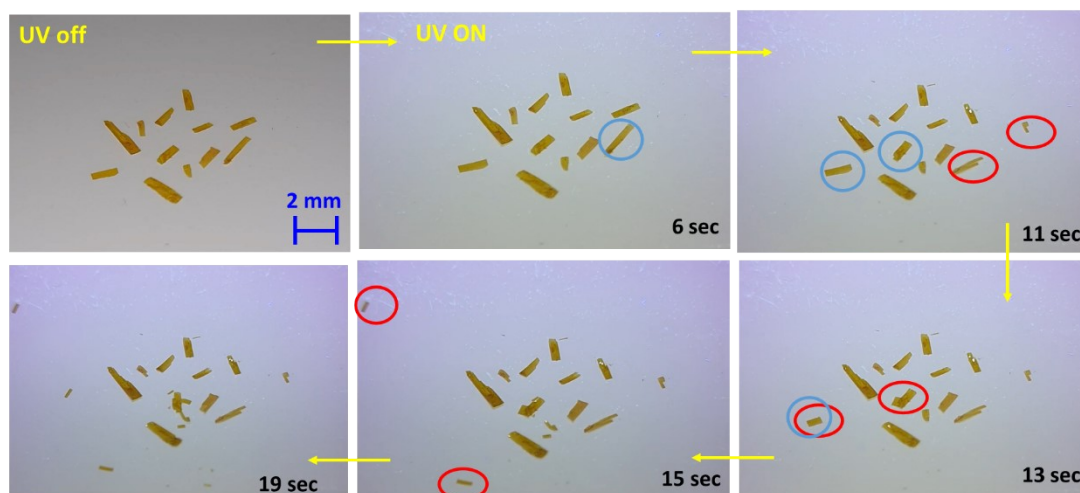

**Fig. S8** Single crystals of **C-1** showing photomechanical motion under UV light. The initial and final positions are marked as blue and red circles respectively. The images were extracted from video S3.

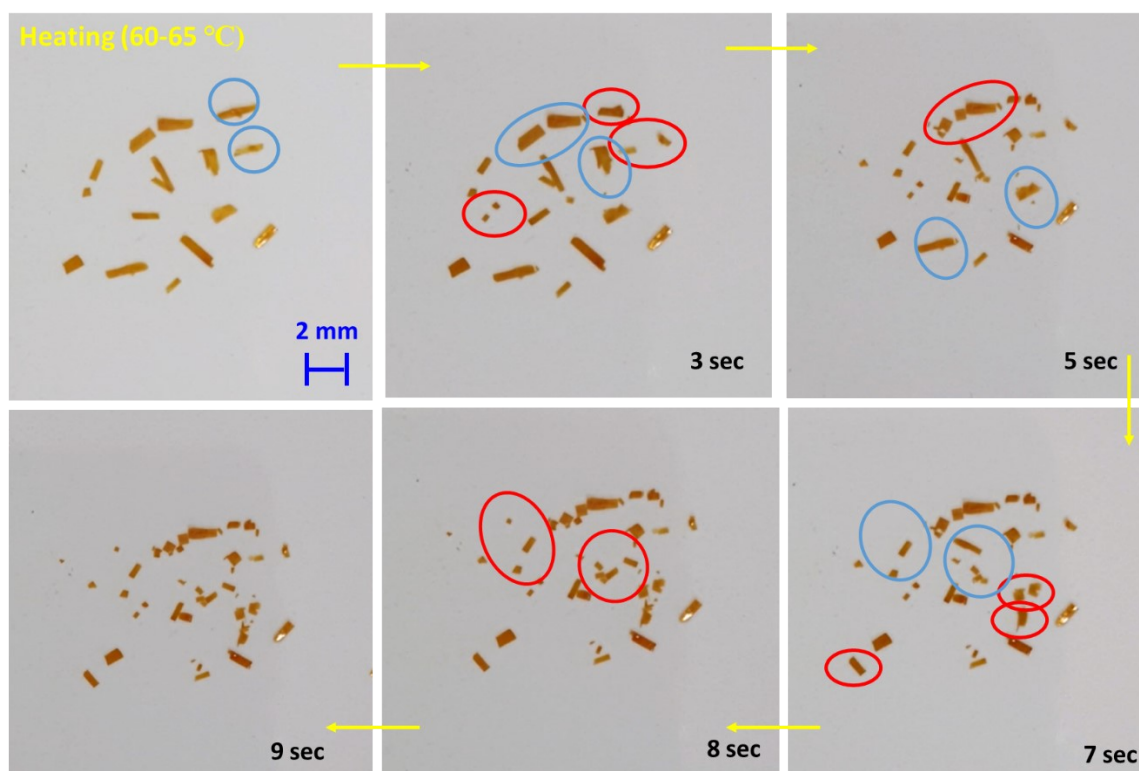

**Fig. S9** Single crystals of **C-1** showing the thermomechanical motion at temperature 60-65 °C. The initial and final positions are marked as blue and red circles respectively. The images were extracted from Video S6.

**Table S4.** Distance transverse by the crystal of different sizes

| <b>Crystals (size)</b> | <b>Distance transverse (mm)<br/>(photomechanical)</b>  |
|------------------------|--------------------------------------------------------|
| 2.0 mm×0.7mm×0.05      | 3.68                                                   |
| 1.7 mm×0.5mm×0.04      | 2.77                                                   |
| 1.7 mm×0.3mm×0.05      | 1.98 , 2.80, 2.07                                      |
| 1.0 mm×0.3mm×0.02      | 2.55                                                   |
| 2.0 mm×0.8mm×0.05      | 1.1                                                    |
| 1.5 mm×0.6mm×0.05      | 1.5                                                    |
| 1.0 mm×0.5mm×0.06      | 3.1                                                    |
| <b>Crystals</b>        | <b>Distance transverse (mm)<br/>(Thermomechanical)</b> |
| 1.8 mm×0.5mm×0.05      | 1.8                                                    |
| 1.7 mm×0.6mm×0.05      | 1.2                                                    |
| 1.5 mm×0.5mm×0.04      | 1.1                                                    |
| 2.0 mm×0.7mm×0.03      | 2.2                                                    |
| 1.3 mm×0.5mm×0.04      | 1.9                                                    |

**Table S5.** Lattice parameters of **C-1** extracted from the VT-PXRD data (30 and 60°C).

| <b>Parameters</b> | <b>C-1 (30 °C)</b> | <b>C-1 (60 °C)</b> | <b>Change</b> | <b>% change</b> |
|-------------------|--------------------|--------------------|---------------|-----------------|
| <i>a</i>          | 15.7307            | 15.7337            | 0.003         | 0.019           |
| <i>b</i>          | 4.7402             | 6.2307             | 1.49          | 31.43           |
| <i>c</i>          | 28.6694            | 28.6808            | 0.005         | 0.017           |
| <i>V</i>          | 1940.70            | 2551.38            | 610.68        | 31.46           |

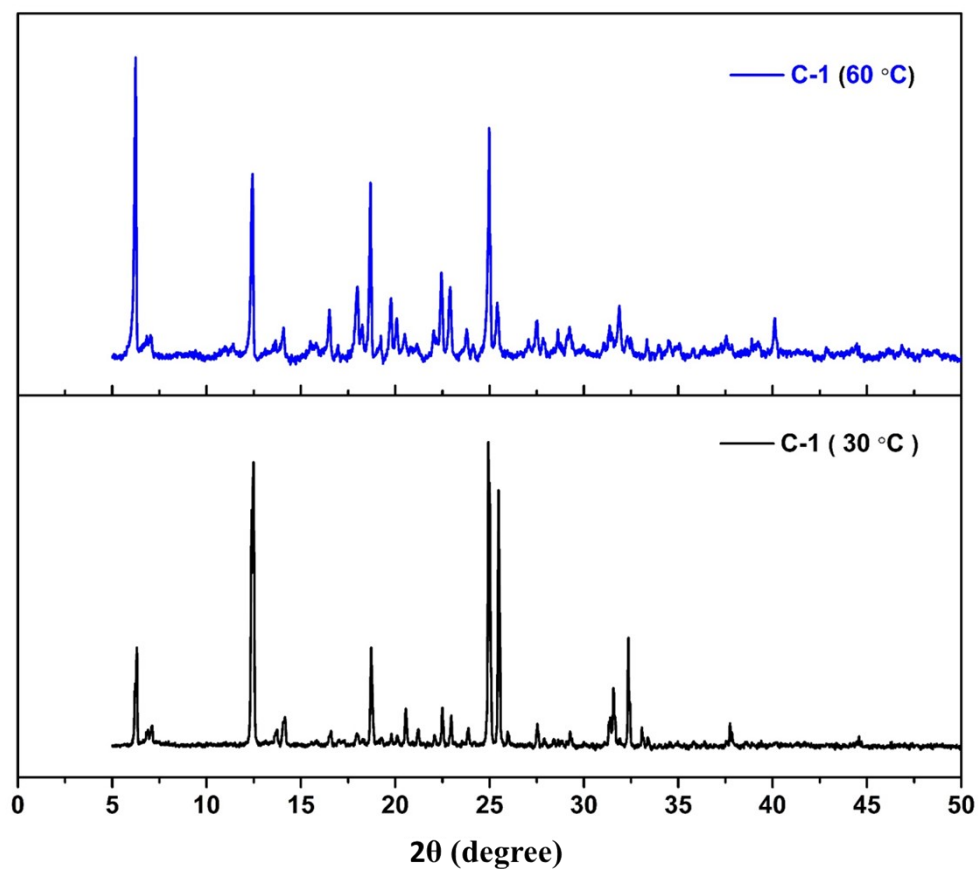

Fig. S10. PXRD pattern of C-1 (30 and 60°C).

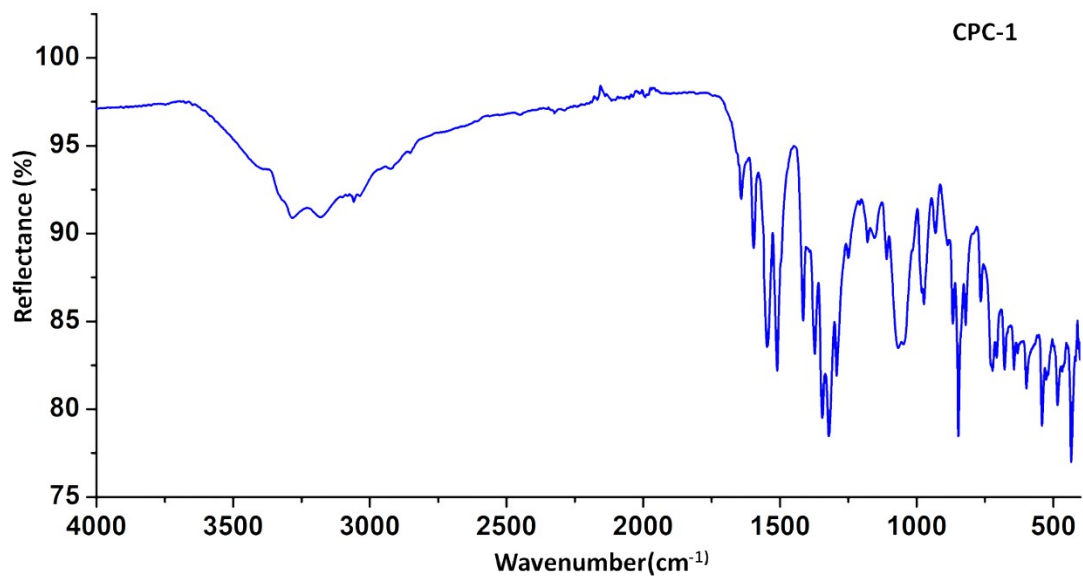

Fig. S11 FTIR Spectrum of CPC-1.

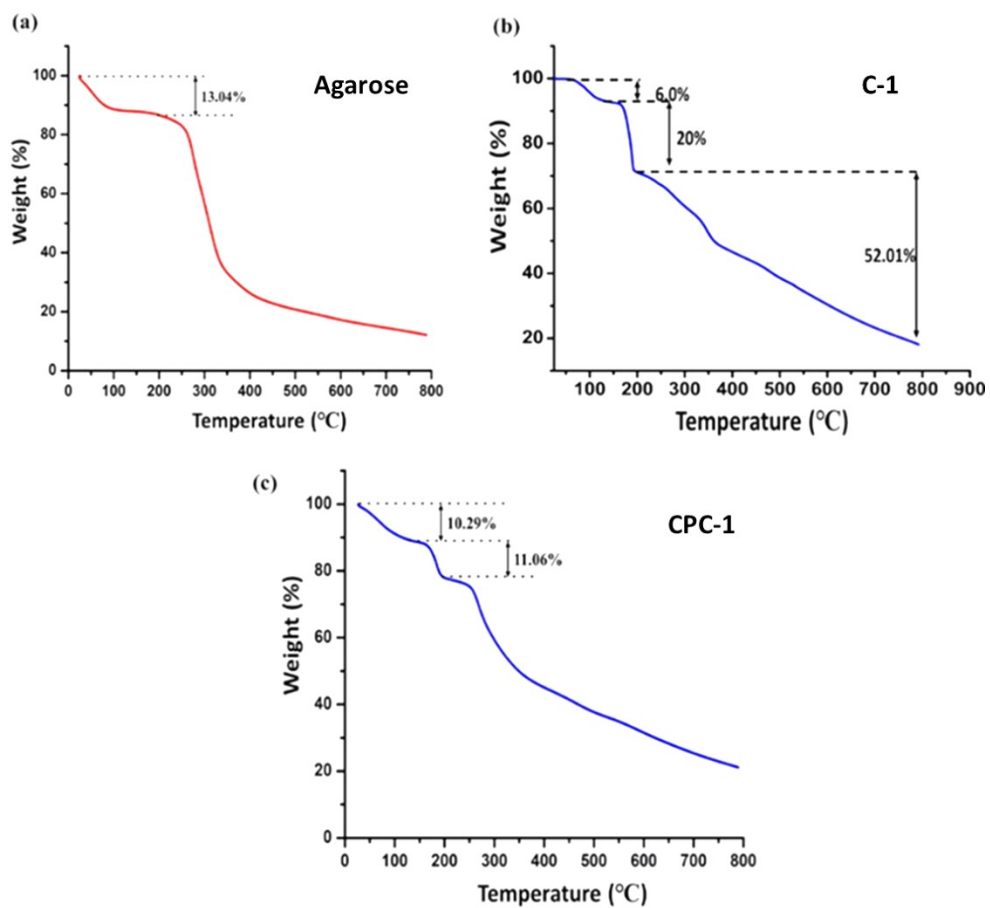

**Fig. S12** TGA curves of (a) agarose film (b) C-1 crystals (c) CPC-1.

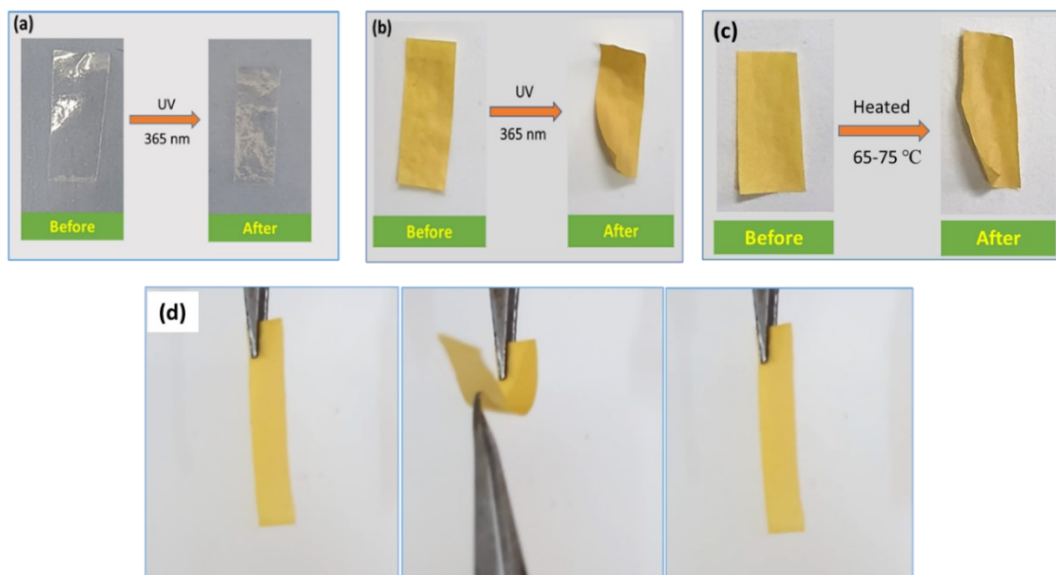

**Fig. S13** (a) Pure Agarose Film (b) CPC-1 under UV light (c) CPC-1 film under heating (d) Flexibility test of CPC-1 film.

### **Video Description**

**Video S1-3:** Photomechanical behaviour of **C-1** crystals.

**Video S4:** Photomechanical behaviour (bending) of a single crystal of **C-1**.

**Video S5-6:** Thermomechanical behaviour of **C-1** crystals.

**Video S7:** Flexibility test of **CPC-1** Film.

**Video S8:** Photomechanical behaviour of **CPC-1** film.

**Video S9:** Thermomechanical behaviour of **CPC-1** film.
